# Supplementary material
Source: Springer Nature journal article supplement (https://www.springermedizin.de/resource/supplementary/12879_2013_3059_MOESM2_ESM.pdf/9445854)
Supplement: MOESM2 [file 9445854]

08/2010

03/2012

10/2013

04/2013

08/2013

PSL  
(mg)

30

20

10

0

Mizoribine

ADA

RIF 450 mg

RBT 150 mg 300 mg

TAC 1 mg

CAM 800 mg

1000 mg

EMB 750 mg

SM 0.75 g × 3/week

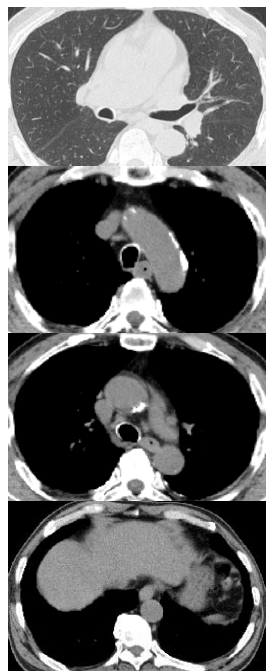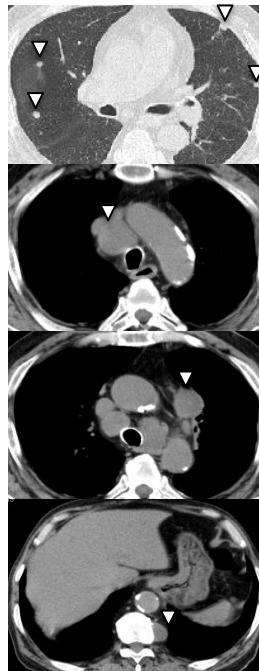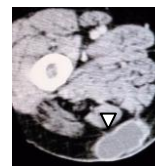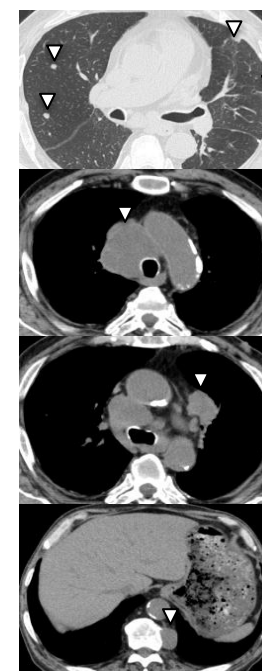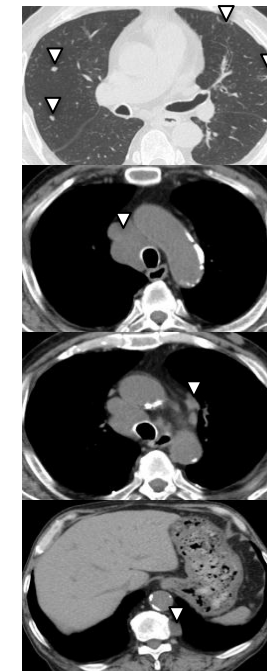

|                        |        |                |        |                      |        |                      |                      |        |
|------------------------|--------|----------------|--------|----------------------|--------|----------------------|----------------------|--------|
| <b>Acid-fast stain</b> | +++    | +++            | -      | ++                   | -      | -                    | -                    | -      |
| <b>PCR</b>             | +      | +              | -      | +                    | -      | -                    | -                    | -      |
| <b>Culture result</b>  | +      | +              | -      | -                    | -      | -                    | -                    | -      |
| <b>Specimen</b>        | Sputum | Mediastinal LN | Sputum | Subcutaneous abscess | Sputum | Subcutaneous abscess | Subcutaneous abscess | Sputum |
